# Supplementary material for: Metatranscriptomic profiling reveals pathogen and host response signatures of pediatric acute sinusitis and upper respiratory infection
Source: Springer Nature journal article supplement (doi:10.1186/s13073-025-01447-3), 2025-03-17
Supplement: MOESM1 [file 13073_2025_1447_MOESM1_ESM.pdf]

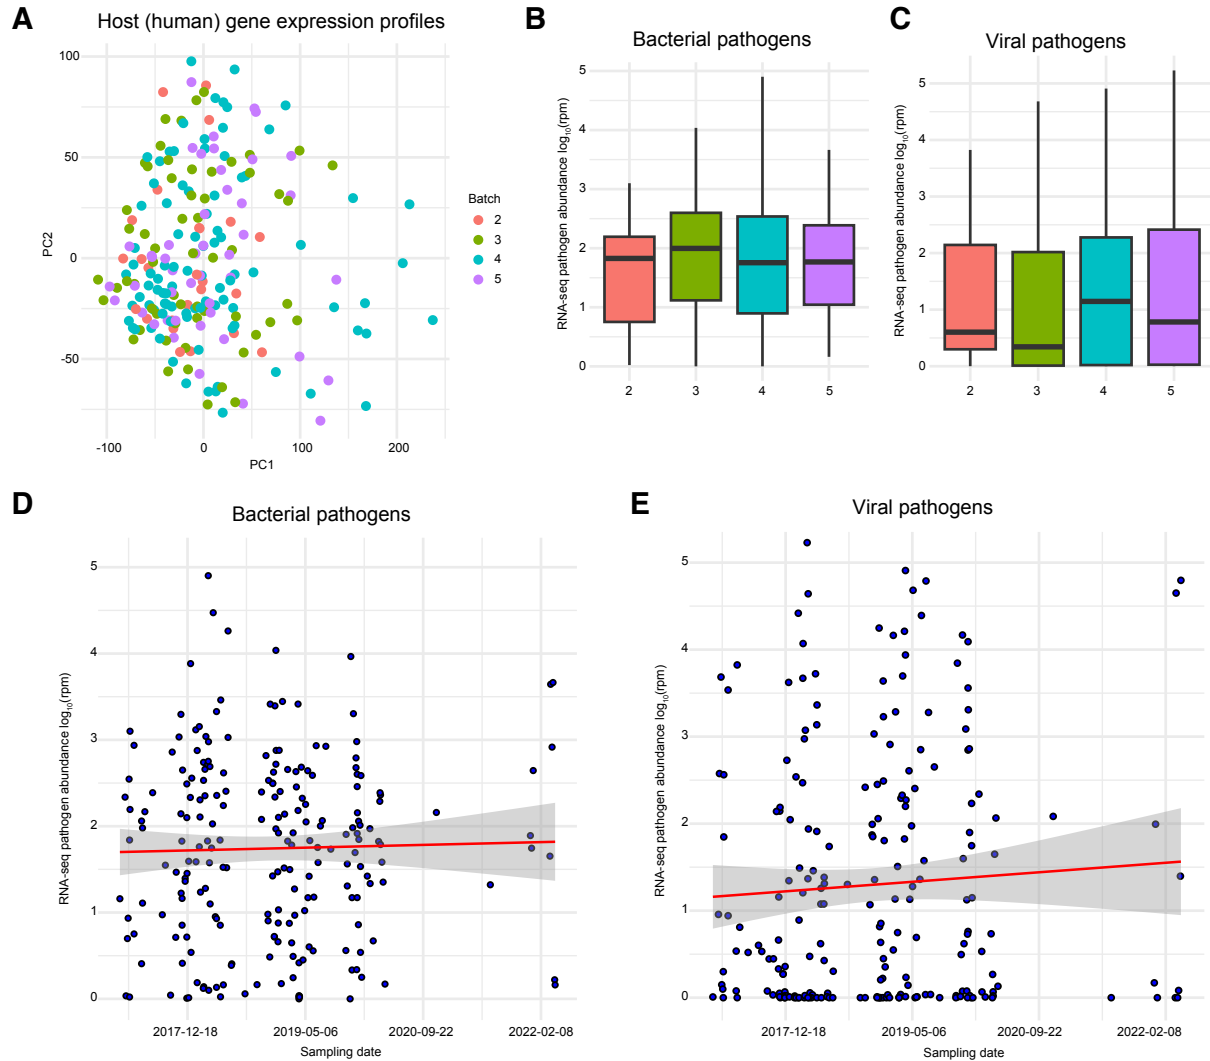

**Fig S1.** Investigation of potential batch effects across batches 2-5. **(A)** PCA plot of all 221 samples based on complete host (human) transcriptomic profiles. Distribution of total bacterial pathogen **(B)** and viral pathogen **(C)** abundance across batches. No significant differences were detected. Distribution of total bacterial **(D)** and viral **(E)** pathogen abundance values versus sampling date. No significant patterns were detected.

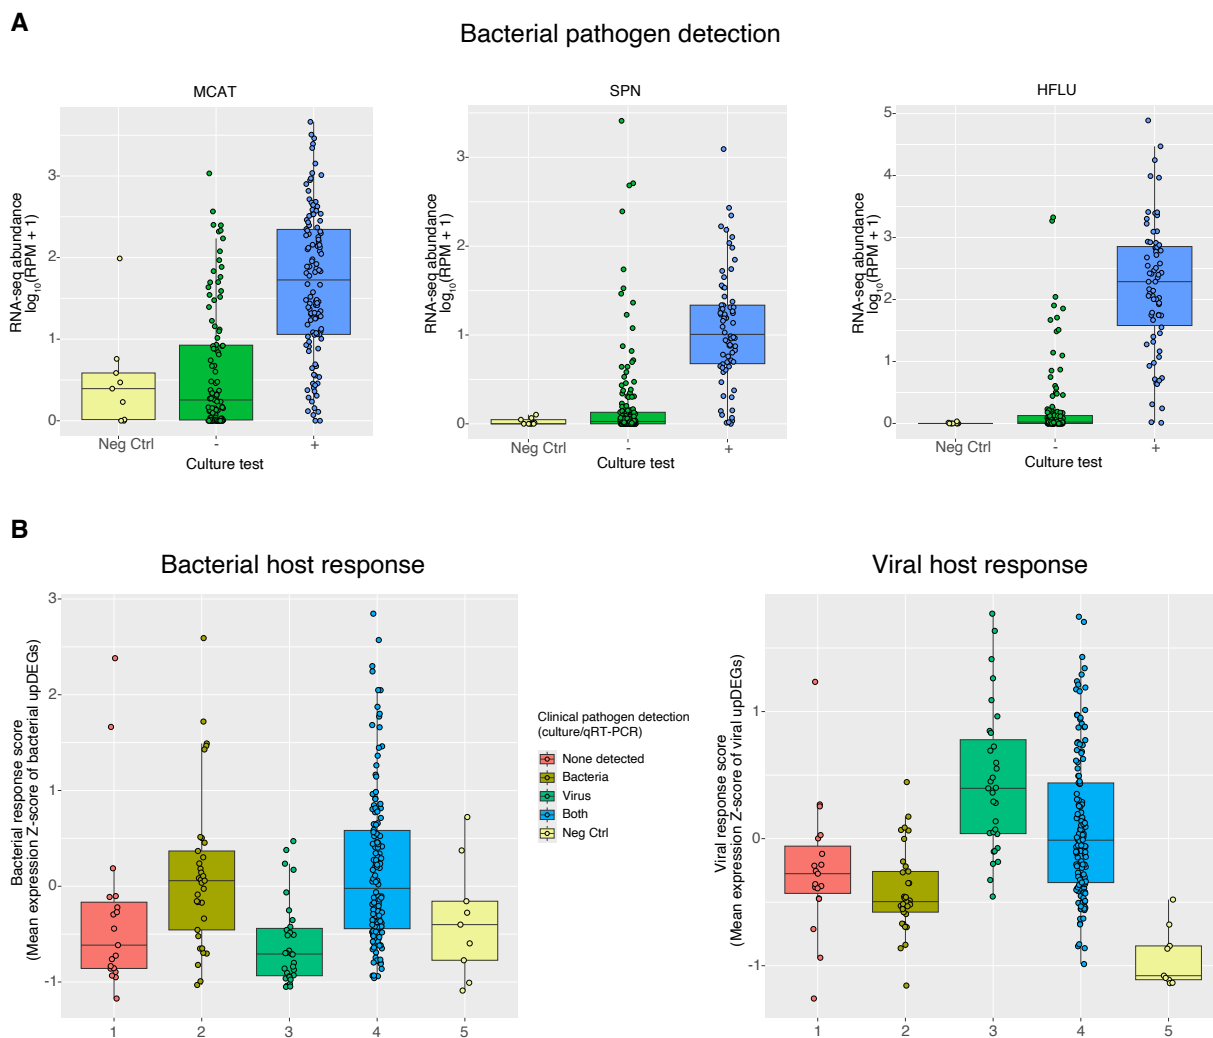

**Fig S2.** Bacterial pathogen abundance and host-responses detected by metatranscriptomics including nine negative control samples. **(A)** Abundance of MCAT, SPN, and HFLU in culture positive and negative samples as well as negative controls based on Kraken2 taxonomic profiling. **(B)** Bacterial and viral host responses based on average Z-scores of bacterial-associated and viral-associated upDEGs.

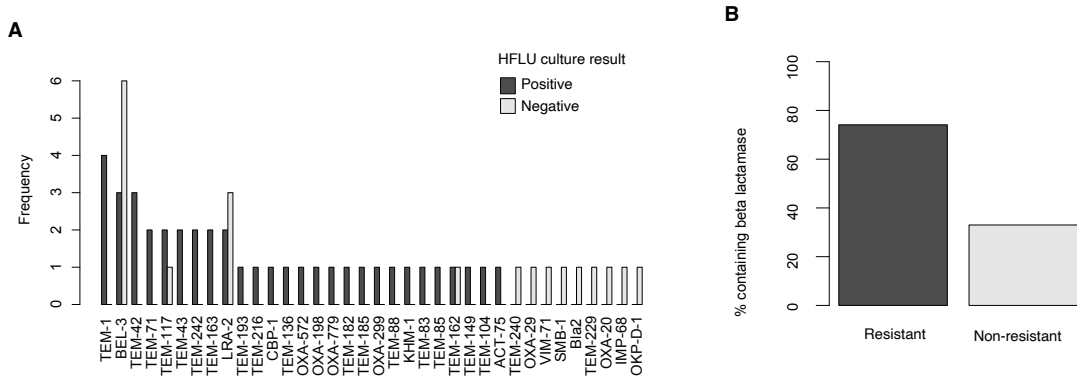

**Fig S3.** Detected beta-lactamase genes by CARD in resistant versus non-resistant HFLU samples. **(A)** Frequency histogram of genes detected across all HFLU-positive and negative samples (based on culture tests). **(B)** Percent of resistant and non-resistant samples with detected beta lactamase genes.



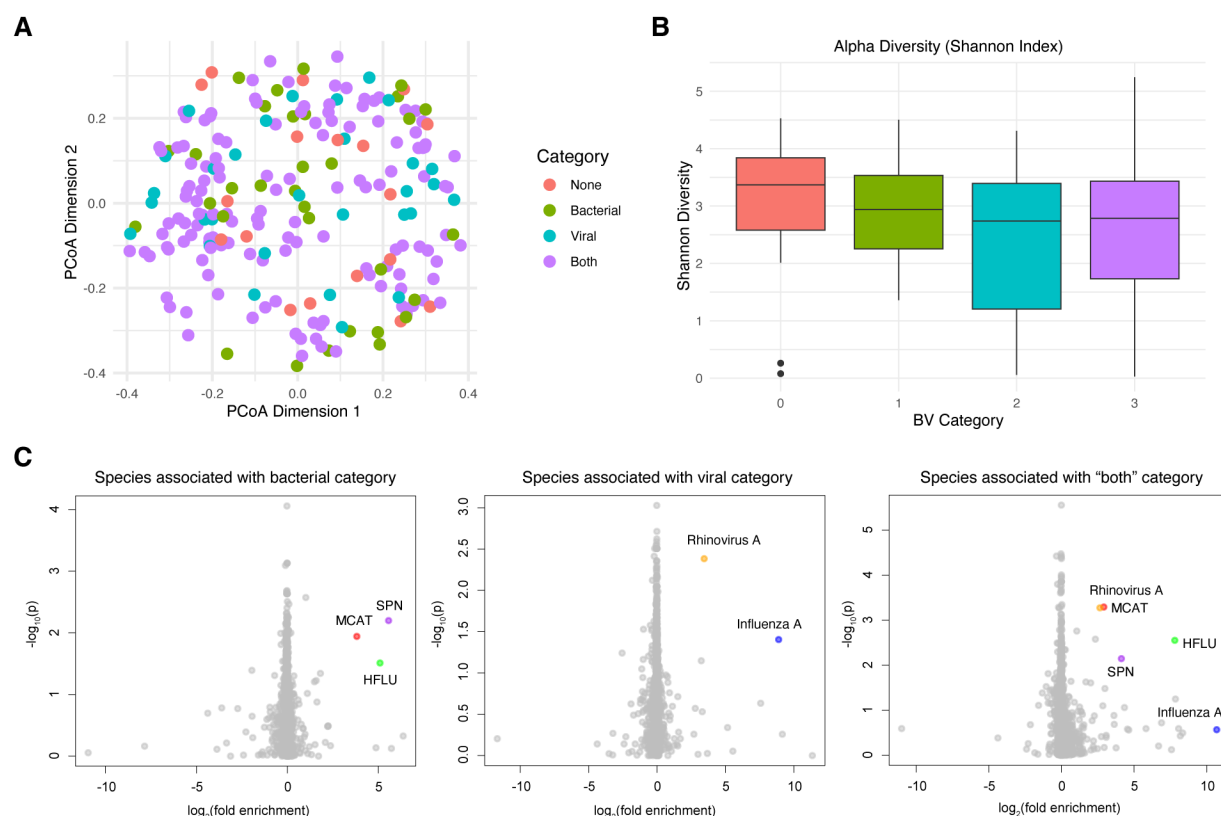

**Fig S5.** Microbiome analysis of 221 patient metatranscriptomes. **(A)** PCoA ordination of all samples colored by clinical category (no pathogens detected, bacterial, viral, both). **(B)** Comparison of alpha diversity (Shannon index) across the four categories. No significant differences were detected between individual groups, whereas samples associated with infections (groups 1-3) had significantly reduced average Shannon diversity compared to group 0 ( $p < 0.05$ ). **(C)** Species associated with groups 1, 2, and 3 were identified computing the  $\log_2$  fold enrichments over “group 0” as well as by abundance comparisons using Wilcoxon rank sum tests, resulting in  $-\log_{10}(p)$  values). Species with  $\log_2$  fold changes greater than 1 and less than -1, with nominal  $p$ -values  $< 0.05$  were explored. As expected, the three bacterial pathogens (MCAT, SPN, HFLU) were detected, as well as two commonly detected viruses (Influenza A and Rhinovirus A).

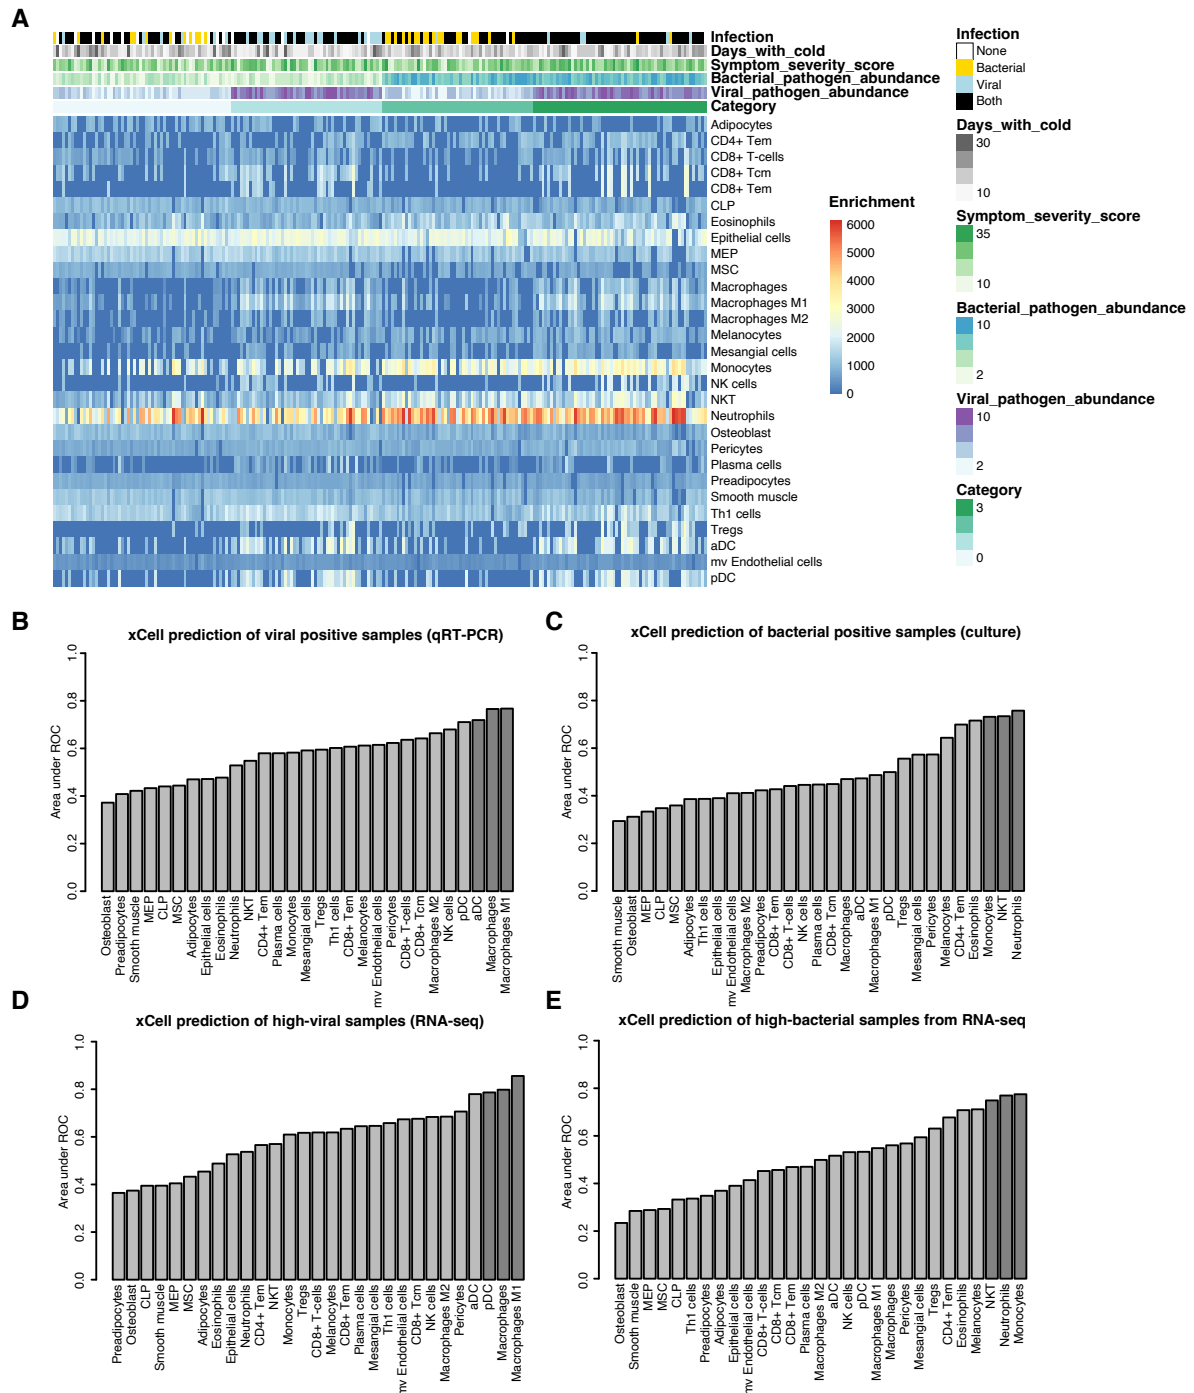

**Fig S6.** Cell type enrichment analysis of NP swab RNA-seq datasets from 221 patients. (A) Heatmap showing enrichment scores for all cell types with  $p$ -values  $< 0.1$ . (B-E) Ability of cell enrichment scores to predict bacterial and viral infections (culture/qRT-PCR categories as well as RNA-seq categories) as indicated by area under ROC curves.

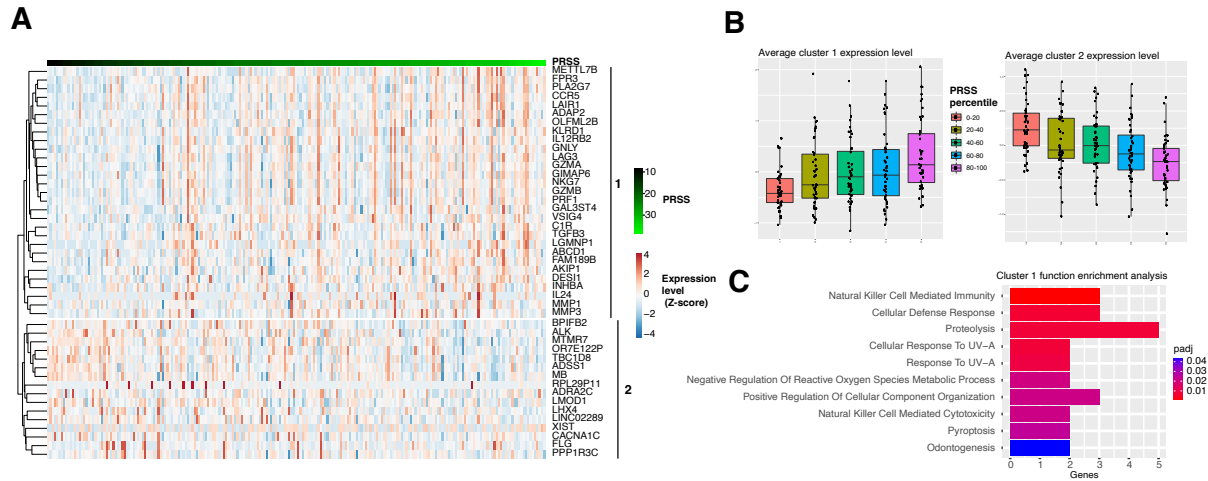

**Fig S7.** Differential host response expression analysis based on patients' symptom severity score (PRSS) at time of sample collection. **(A)** Heatmap displays the DEGs with  $q < 0.05$ . A total of 45 genes were differentially expressed and are divided into 2 clusters on the heatmap based on their expression patterns. **(B)** Average expression level (Z-scores) of genes in cluster 1 and cluster 2 for five PRSS percentile categories. **(C)** Significantly enriched ( $q < 0.05$ ) GO Biological Process 2021 database pathways results using EnrichR of gene cluster 1.
